# Supplementary material for: Allergic Rhinitis Systematic Review Shows the Trends in Prevalence in Children and Adolescents in Greece since 1990
Source: MDPI journal article supplement (doi:10.3390/allergies3040014), 2023-11-06
Supplement: s1 [file s1]

**Table S1.** Characteristics of surveys reported.

| <b>Reference</b>             | <b>Study design</b> | <b>Year</b> | <b>Sample</b> | <b>Age (yrs)</b> | <b>Region</b>       | <b>Rhinitis Prevalence</b> | <b>Level of evidence</b> |
|------------------------------|---------------------|-------------|---------------|------------------|---------------------|----------------------------|--------------------------|
| Anthracopoulos et al. [11]   | Cross-sectional     | 1991        | 2417          | 8-10             | Patra, S            | 2.1%                       | III                      |
| Malliori et al. [12]         | Cross-sectional     | 1991        | 2417          | 8-10             | Patra, S            | 2.1%                       | III                      |
| Anthracopoulos et al. [11]   | Cross-sectional     | 1998        | 3076          | 8-10             | Patra, S            | 3.4%                       | III                      |
| Malliori et al. [12]         | Cross-sectional     | 1998        | 3076          | 8-10             | Patra, S            | 3.4%                       | III                      |
| Papadopoulou et al. [15, 16] | Cross-sectional     | 2000        | 1000          | 9-10             | Athens, C           | 5.2%                       | III                      |
| Papadopoulou et al. [15, 16] | Cross-sectional     | 2000        | 1023          | 9-10             | Thessaloniki, N     | 8.2%                       | III                      |
| Sichletidis et al. [14]      | Cross-sectional     | 2001        | 2005          | 9-12             | Thessaloniki, N     | 12.6%                      | III                      |
| Anthracopoulos et al. [11]   | Cross-sectional     | 2003        | 2725          | 8-10             | Patra, S            | 4.6%                       | III                      |
| Malliori et al. [12]         | Cross-sectional     | 2003        | 2725          | 8-10             | Patra, S            | 4.6%                       | III                      |
| Malliori et al. [12]         | Cross-sectional     | 2008        | 2688          | 8-10             | Patra, S            | 5.1%                       | III                      |
| Malliori et al. [12]         | Cross-sectional     | 2013        | 2554          | 8-10             | Patra, S            | 4.4%                       | III                      |
| Katotomichelakis et al. [13] | Cross-sectional     | 2016        | 843           | 6-17             | Evros prefecture, N | 34.2%                      | III                      |
| Siguardardottir et al. [10]  | Cohort              | 2017        | 517           | 6-10             | Athens, C           | 5.8%                       | II                       |
| Antonogeorgos et al. [17]    | Cross-sectional     | 2020        | 1934          | 12-14            | Athens, C           | 25.3%                      | III                      |

Abbreviations: W, West, N, North, S, South, E, East, C, Central

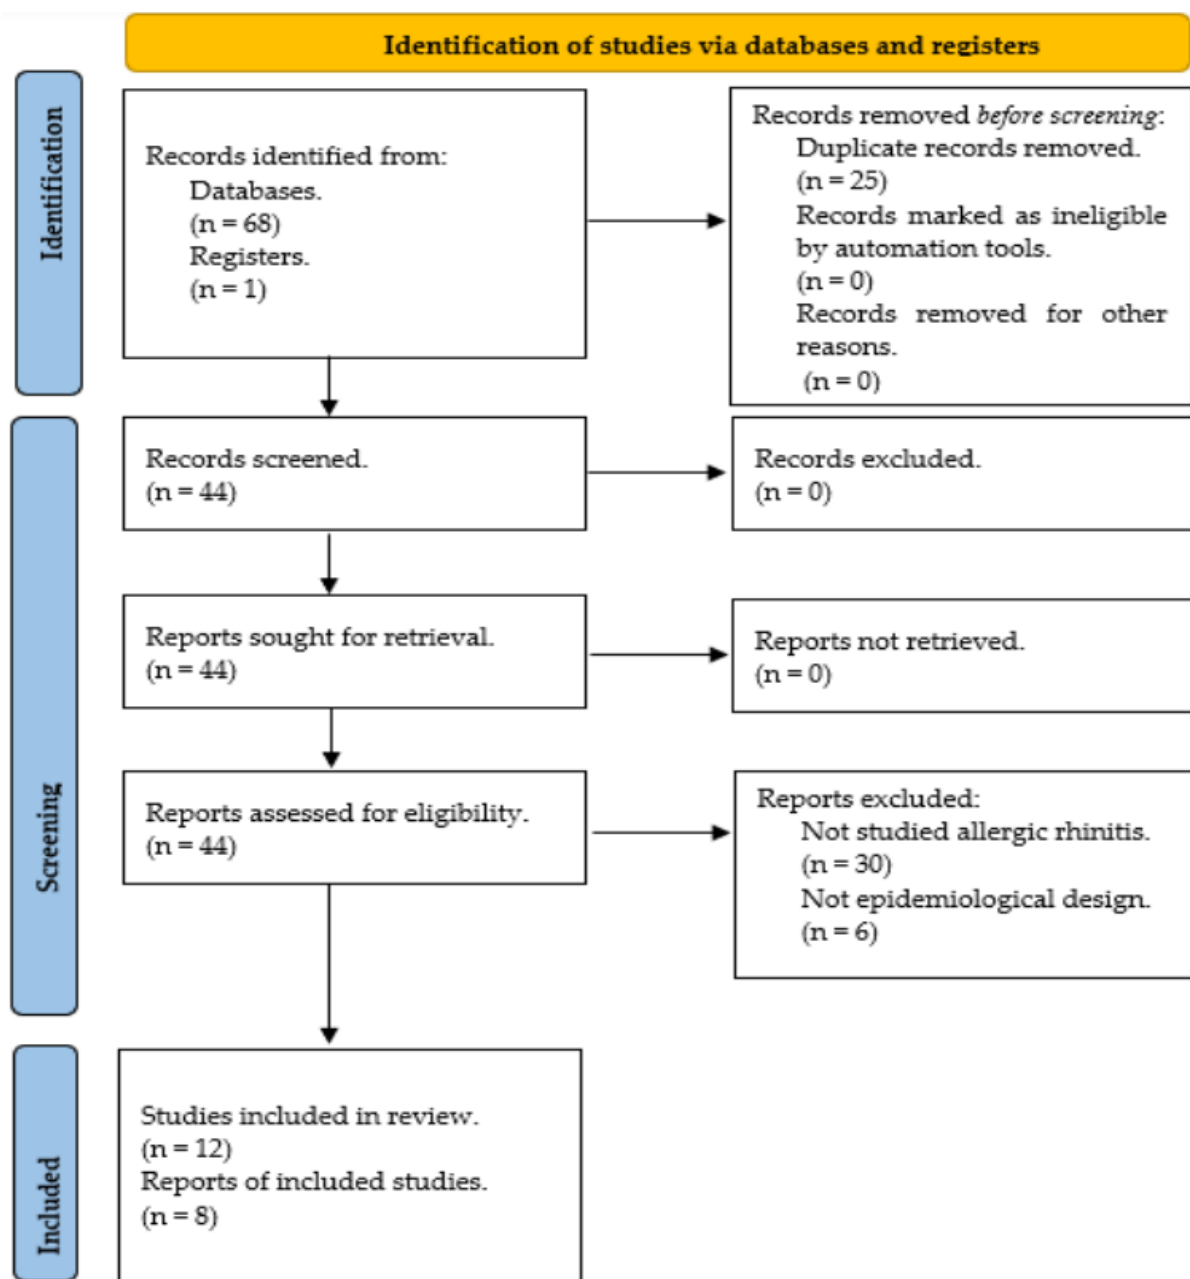

Figure S1. Flow chart of the selection process.
